# Supplementary material
Source: MDPI journal article supplement (https://www.mdpi.com/2073-4395/10/9/1278)
Supplement: s1 [file s1]

**Table S1.** Characteristics of 424 soybean accessions in conditions of Krasnodar and Primorye Territories of Russia.

| #  | VIR Catalog number | Accession name           | Country of origin | Maturity group | Krasnodar Territory        |                  |                      | Primorye Territory         |                  |                      |
|----|--------------------|--------------------------|-------------------|----------------|----------------------------|------------------|----------------------|----------------------------|------------------|----------------------|
|    |                    |                          |                   |                | Yield (g m <sup>-2</sup> ) | Days to maturity | 1000 seed weight (g) | Yield (g m <sup>-2</sup> ) | Days to maturity | 1000 seed weight (g) |
| 1  | 5065               | BAI-MEI                  | China             | Middle         | 142.7                      | 128.0            | 237.8                | 156.7                      | 120              | -                    |
| 2  | 5127               | FUSHOU                   | China             | Late           | 234.0                      | 139.7            | 163.8                | 183.3                      | 117              | -                    |
| 3  | 5225               | FU-SHOU                  | China             | Late           | 293.5                      | 144.9            | 205.3                | 165.0                      | 119              | -                    |
| 4  | 5466               | BAI-HUA-TCO-TCZY         | China             | Late           | 293.3                      | 132.0            | 182.9                | 155.0                      | 116              | -                    |
| 5  | 9177               | LINIYA DA 103            | Russia            | Early          | 24.9                       | 107.3            | 154.5                | 28.3                       | 91               | -                    |
| 6  | 9332               | OMSKAYA 4                | Russia            | Early          | 149.6                      | 98.7             | 157.4                | 77.5                       | 97               | -                    |
| 7  | 9515               | LINIYA NOM.52 M          | Russia            | Early          | 158.1                      | 97.3             | 149.5                | 81.7                       | 90               | -                    |
| 8  | 9550               | SIBLEY                   | USA               | Middle         | 192.9                      | 122.7            | 176.8                | 293.8                      | 116              | -                    |
| 9  | 9551               | LINIYA 72                | Moldova           | Middle         | 319.3                      | 119.3            | 159.5                | 153.3                      | 110              | -                    |
| 10 | 9552               | LINIYA 99                | Moldova           | Middle         | 343.9                      | 117.0            | 148.1                | 98.3                       | 112              | -                    |
| 11 | 9553               | LINIYA 101               | Moldova           | Early          | 225.3                      | 101.7            | 132.5                | 91.7                       | 98               | -                    |
| 12 | 9554               | LINIYA 102               | Moldova           | Middle         | 264.2                      | 118.0            | 147.7                | 175.0                      | 114              | -                    |
| 13 | 9555               | LINIYA 103               | Moldova           | Late           | 181.0                      | 130.7            | 150.6                | 251.7                      | 116              | -                    |
| 14 | 9556               | LINIYA 104               | Moldova           | Middle         | 235.8                      | 124.0            | 150.9                | 77.5                       | 108              | -                    |
| 15 | 9557               | LINIYA 105               | Moldova           | Middle         | 143.3                      | 123.7            | 156.0                | 166.7                      | 115              | -                    |
| 16 | 9558               | LINIYA 106               | Moldova           | Late           | 262.2                      | 131.0            | 150.5                | 133.3                      | 121              | -                    |
| 17 | 9559               | LINIYA 108               | Moldova           | Middle         | 253.8                      | 119.7            | 136.0                | 163.3                      | 110              | -                    |
| 18 | 9566               | LINIYA 110               | Moldova           | Early          | 182.7                      | 108.7            | 171.1                | 153.8                      | 107              | -                    |
| 19 | 9567               | LINIYA 111               | Moldova           | Middle         | 240.4                      | 123.7            | 203.5                | 113.3                      | 115              | -                    |
| 20 | 9578               | K 001                    | Moldova           | Middle         | 302.2                      | 114.0            | 184.2                | 135.0                      | 103              | -                    |
| 21 | 9579               | K 002                    | Moldova           | Middle         | 190.2                      | 111.3            | 143.0                | 128.3                      | 109              | -                    |
| 22 | 9580               | ALTAIR                   | Ukraine           | Middle         | 200.7                      | 114.3            | 157.0                | 110.0                      | 102              | -                    |
| 23 | 9581               | DEMETRA                  | Ukraine           | Middle         | 251.1                      | 121.3            | 149.6                | 170.0                      | 111              | -                    |
| 24 | 9582               | YUZHANKA                 | Ukraine           | Middle         | 324.0                      | 125.4            | 171.3                | 250.0                      | 115              | -                    |
| 25 | 9583               | 3S                       | Russia            | Early          | 36.5                       | 109.5            | 148.9                | 105.0                      | 94               | -                    |
| 26 | 9584               | HARKOVSKAYA SKOROSPELAYA | Ukraine           | Early          | 158.6                      | 97.7             | 144.2                | 80.0                       | 92               | -                    |
| 27 | 9585               | HARKOVSKAYA 66           | Ukraine           | Early          | 174.0                      | 100.3            | 116.2                | 168.3                      | 92               | -                    |
| 28 | 9594               | LINIYA NOM.7             | Russia            | Early          | 164.4                      | 96.0             | 163.2                | 71.7                       | 94               | -                    |

|    |      |                              |            |        |       |       |       |       |     |   |
|----|------|------------------------------|------------|--------|-------|-------|-------|-------|-----|---|
| 29 | 9595 | LINIYA 90131                 | Moldova    | Early  | 143.6 | 101.0 | 132.1 | 156.7 | 102 | - |
| 30 | 9596 | LINIYA 90132                 | Moldova    | Early  | 127.5 | 103.0 | 176.3 | 136.7 | 105 | - |
| 31 | 9597 | LINIYA 90133                 | Moldova    | Middle | 292.6 | 128.7 | 193.1 | 130.0 | 115 | - |
| 32 | 9598 | LINIYA 90134                 | Moldova    | Middle | 211.7 | 115.0 | 117.3 | 121.7 | 109 | - |
| 33 | 9599 | LINIYA 90135                 | Moldova    | Middle | 249.7 | 117.0 | 145.0 | 188.3 | 109 | - |
| 34 | 9600 | LINIYA 90136                 | Moldova    | Early  | 273.8 | 104.7 | 143.5 | 153.3 | 110 | - |
| 35 | 9601 | LINIYA 90137                 | Moldova    | Early  | 161.8 | 99.3  | 175.1 | 126.7 | 101 | - |
| 36 | 9602 | LINIYA 90138                 | Moldova    | Middle | 321.9 | 125.3 | 148.3 | 290.0 | 114 | - |
| 37 | 9603 | LINIYA 90139                 | Moldova    | Early  | -     | 105.3 | 147.9 | 141.7 | 110 | - |
| 38 | 9604 | LINIYA 90140                 | Moldova    | Early  | 178.1 | 107.7 | 170.2 | 150.0 | 100 | - |
| 39 | 9605 | LINIYA 9084                  | Moldova    | Middle | 409.8 | 125.0 | 148.8 | 253.3 | 119 | - |
| 40 | 9608 | YUG 30                       | Ukraine    | Early  | 147.3 | 99.7  | 154.9 | 100.0 | 100 | - |
| 41 | 9614 | BYSTRITCA 2                  | Russia     | Early  | 219.2 | 108.3 | 134.0 | 175.0 | 114 | - |
| 42 | 9615 | ALISA                        | Russia     | Middle | 185.0 | 116.0 | 106.6 | 235.0 | 121 | - |
| 43 | 9616 | LADYA                        | Russia     | Middle | 221.6 | 121.0 | 143.2 | 187.5 | 121 | - |
| 44 | 9631 | S-5                          | France     | Early  | 159.8 | 103.0 | 207.0 | 86.3  | 95  | - |
| 45 | 9632 | S-13                         | France     | Early  | 185.0 | 104.1 | 198.8 | 148.8 | 99  | - |
| 46 | 9644 | BICENTENNIAL                 | Canada     | Middle | 205.9 | 111.3 | 186.6 | 141.7 | 109 | - |
| 47 | 9647 | HOYT                         | USA        | Late   | 302.5 | 135.7 | 178.0 | 165.0 | 118 | - |
| 48 | 9648 | MAPLE RIDGE                  | Canada     | Early  | 182.8 | 98.8  | 165.3 | 76.7  | 99  | - |
| 49 | 9650 | ASGROW 3127                  | USA        | Late   | 267.1 | 142.3 | 159.4 | 175.0 | 122 | - |
| 50 | 9651 | PIONEER 3981                 | USA        | Late   | 438.8 | 143.7 | 191.9 | 253.3 | 117 | - |
| 51 | 9652 | REGAL                        | USA        | Late   | 331.1 | 143.9 | 195.0 | 260.0 | 120 | - |
| 52 | 9653 | OS-87-2                      | Yugoslavia | Middle | 234.9 | 117.0 | 170.6 | 309.0 | 109 | - |
| 53 | 9654 | NS-87-1                      | Yugoslavia | Middle | 198.4 | 120.3 | 134.4 | 221.0 | 110 | - |
| 54 | 9655 | OS-87-3                      | Yugoslavia | Middle | 266.5 | 118.0 | 164.8 | 161.0 | 109 | - |
| 55 | 9656 | OS-87-4                      | Yugoslavia | Middle | 244.5 | 122.7 | 151.7 | 220.0 | 116 | - |
| 56 | 9661 | HARKOVSKAYA<br>ZERNOUKOSNAYA | Ukraine    | Early  | 206.5 | 105.0 | 142.9 | 155.0 | 98  | - |
| 57 | 9662 | VIKTORIYA                    | Ukraine    | Early  | 189.1 | 106.0 | 123.7 | 183.3 | 98  | - |
| 58 | 9734 | INGULA                       | Ukraine    | Early  | 175.3 | 102.7 | 131.8 | 103.3 | 110 | - |
| 59 | 9735 | VYS                          | Ukraine    | Early  | 201.6 | 107.5 | 150.2 | 126.3 | 110 | - |
| 60 | 9736 | IZUMRUDNAYA                  | Ukraine    | Early  | 218.4 | 105.7 | 132.7 | 217.5 | 117 | - |
| 61 | 9737 | PETROVKA                     | Ukraine    | Middle | 182.4 | 112.3 | 132.3 | 142.5 | 115 | - |

|    |      |               |         |        |       |       |       |       |     |   |
|----|------|---------------|---------|--------|-------|-------|-------|-------|-----|---|
| 62 | 9738 | KORSAKOVKA    | Ukraine | Middle | 214.3 | 118.0 | 120.3 | 187.5 | 114 | - |
| 63 | 9739 | DRUZHBA-90    | Ukraine | Middle | 198.1 | 119.3 | 130.7 | 172.5 | 115 | - |
| 64 | 9740 | LINIYA 62     | Moldova | Early  | 172.8 | 101.7 | 124.1 | 83.3  | 109 | - |
| 65 | 9741 | LINIYA 63     | Moldova | Middle | 205.0 | 124.3 | 128.5 | 203.8 | 120 | - |
| 66 | 9742 | LINIYA 64     | Moldova | Early  | 120.6 | 101.3 | 145.2 | 151.7 | 108 | - |
| 67 | 9743 | LINIYA 70     | Moldova | Middle | 204.5 | 128.7 | 153.5 | 151.3 | 120 | - |
| 68 | 9744 | no name       | Moldova | Early  | 104.7 | 99.7  | 180.8 | 73.3  | 105 | - |
| 69 | 9745 | LINIYA 76     | Moldova | Middle | 175.5 | 126.3 | 151.8 | 178.8 | 121 | - |
| 70 | 9746 | LINIYA 77     | Moldova | Late   | 222.7 | 138.0 | 151.3 | 172.5 | 123 | - |
| 71 | 9747 | LINIYA 78     | Moldova | Middle | 202.1 | 128.0 | 154.7 | 205.0 | 122 | - |
| 72 | 9748 | LINIYA 79     | Moldova | Late   | 228.2 | 130.7 | 157.5 | 197.5 | 122 | - |
| 73 | 9749 | LINIYA 80     | Moldova | Middle | 147.6 | 115.0 | 144.3 | 180.0 | 116 | - |
| 74 | 9750 | no name       | Moldova | Middle | 244.2 | 115.7 | 140.9 | 157.5 | 117 | - |
| 75 | 9751 | VAZ 100       | Russia  | Middle | 120.9 | 111.7 | 121.7 | 132.5 | 110 | - |
| 76 | 9752 | DOZA K        | Russia  | Early  | 129.3 | 106.3 | 112.7 | 172.5 | 117 | - |
| 77 | 9753 | KOBRA         | Russia  | Early  | 130.8 | 106.3 | 202.2 | 157.5 | 114 | - |
| 78 | 9754 | LOKUS         | Russia  | Early  | 182.1 | 107.7 | 128.1 | 180.0 | 114 | - |
| 79 | 9755 | M 1           | Russia  | Early  | 159.2 | 105.3 | 156.8 | 115.0 | 110 | - |
| 80 | 9756 | MARIYA        | Russia  | Early  | 184.4 | 103.7 | 165.7 | 110.0 | 111 | - |
| 81 | 9758 | NINA          | Russia  | Early  | 245.9 | 109.0 | 166.3 | 200.0 | 114 | - |
| 82 | 9759 | K 004         | Moldova | Early  | 160.1 | 105.7 | 155.5 | 115.0 | 112 | - |
| 83 | 9760 | K 003         | Moldova | Early  | 196.0 | 106.3 | 137.6 | 82.5  | 112 | - |
| 84 | 9761 | LINIYA 136/87 | Moldova | Early  | 159.8 | 109.3 | 143.5 | 150.0 | 112 | - |
| 85 | 9762 | LINIYA 106/87 | Moldova | Early  | 174.0 | 108.0 | 153.8 | 125.0 | 112 | - |
| 86 | 9763 | LINIYA 227/87 | Moldova | Early  | 174.9 | 109.0 | 144.0 | 115.0 | 112 | - |
| 87 | 9764 | LINIYA 32/87  | Moldova | Middle | 191.7 | 115.0 | 140.5 | 130.0 | 112 | - |
| 88 | 9765 | LINIYA 404/87 | Moldova | Early  | 185.0 | 103.0 | 133.7 | 102.5 | 112 | - |
| 89 | 9766 | LINIYA 76/91  | Moldova | Early  | 181.3 | 102.7 | 120.1 | 100.0 | 112 | - |
| 90 | 9767 | LINIYA 62/91  | Moldova | Early  | 139.5 | 105.3 | 122.5 | 50.0  | 112 | - |
| 91 | 9768 | LINIYA 891/91 | Moldova | Middle | 179.2 | 116.7 | 119.4 | 165.0 | 120 | - |
| 92 | 9769 | LINIYA 884/91 | Moldova | Middle | 149.4 | 121.3 | 126.3 | 167.5 | 119 | - |
| 93 | 9770 | LINIYA 877/91 | Moldova | Early  | 188.2 | 109.3 | 119.8 | 77.5  | 112 | - |
| 94 | 9771 | LINIYA 885/91 | Moldova | Middle | 172.6 | 115.3 | 123.2 | 142.5 | 116 | - |
| 95 | 9772 | LINIYA 892/91 | Moldova | Middle | 125.6 | 113.0 | 123.1 | 70.0  | 112 | - |

|     |      |                |         |        |       |       |       |       |     |   |
|-----|------|----------------|---------|--------|-------|-------|-------|-------|-----|---|
| 96  | 9773 | LINIYA K 36/91 | Moldova | Middle | 180.1 | 122.3 | 158.7 | 122.5 | 118 | - |
| 97  | 9774 | OKTYABR 70     | Russia  | Early  | 169.4 | 107.0 | 171.1 | 116.7 | 107 | - |
| 98  | 9775 | HU-76-6094     | China   | Early  | 345.7 | 105.0 | 180.6 | 129.0 | 109 | - |
| 99  | 9776 | L 230          | Russia  | Late   | 306.2 | 138.3 | 151.0 | 108.0 | 120 | - |
| 100 | 9778 | GLENWOOD       | USA     | Middle | 266.1 | 129.0 | 152.1 | 211.7 | 108 | - |
| 101 | 9783 | IASI 10        | Japan   | Middle | 296.1 | 124.0 | 166.5 | 188.3 | 116 | - |
| 102 | 9784 | 614/83         | unknown | Middle | 153.4 | 112.0 | 156.1 | 155.0 | 112 | - |
| 103 | 9785 | FORD           | USA     | Early  | 200.7 | 103.3 | 170.1 | 81.7  | 98  | - |
| 104 | 9786 | VAR.BRUNNEA    | unknown | Middle | 295.5 | 119.5 | 157.9 | 81.7  | 101 | - |
| 105 | 9790 | MAPLE ISLE     | Canada  | Early  | 204.5 | 103.0 | 176.0 | 228.3 | 116 | - |
| 106 | 9791 | OAC ARIES      | Canada  | Middle | 279.3 | 124.0 | 157.6 | 128.3 | 108 | - |
| 107 | 9792 | OAC LIBRA      | Canada  | Middle | 215.0 | 112.2 | 164.5 | 145.0 | 109 | - |
| 108 | 9793 | OAC PISCES     | Canada  | Middle | 242.4 | 122.3 | 160.9 | 238.3 | 112 | - |
| 109 | 9794 | OAC SCORPIO    | Canada  | Middle | 270.6 | 121.0 | 185.3 | 128.3 | 107 | - |
| 110 | 9799 | VERDON         | France  | Middle | 469.5 | 124.7 | 160.6 | 166.7 | 118 | - |
| 111 | 9801 | LN 83-2356     | USA     | Late   | 334.7 | 151.0 | 184.3 | 230.0 | 121 | - |
| 112 | 9805 | LUTEO          | Poland  | Early  | -     | 107.3 | 185.3 | 163.3 | 100 | - |
| 113 | 9807 | GIRIN 20       | China   | Late   | 359.0 | 134.7 | 189.2 | 313.3 | 118 | - |
| 114 | 9808 | SUI NUN 4      | China   | Middle | 280.4 | 123.3 | 176.7 | 228.3 | 114 | - |
| 115 | 9809 | no name        | China   | Middle | 131.7 | 124.0 | 161.1 | 128.3 | 114 | - |
| 116 | 9811 | JIU NONG 3 HAO | China   | Middle | 228.5 | 128.3 | 168.6 | 150.0 | 122 | - |
| 117 | 9812 | JIU NONG 4 HAO | China   | Late   | 216.9 | 142.0 | 171.8 | 207.5 | 121 | - |
| 118 | 9814 | JIU NONG 6 HAO | China   | Middle | 127.3 | 123.3 | 150.0 | 172.5 | 121 | - |
| 119 | 9815 | CHANDOR        | France  | Middle | 395.6 | 122.7 | 194.9 | 238.3 | 104 | - |
| 120 | 9822 | VILIYA         | Belarus | Early  | 227.9 | 99.3  | 159.0 | 171.7 | 99  | - |
| 121 | 9826 | UBORT          | Belarus | Early  | 181.0 | 100.3 | 128.2 | 203.3 | 98  | - |
| 122 | 9827 | STVIGA         | Belarus | Early  | 220.4 | 100.0 | 131.2 | 178.3 | 98  | - |
| 123 | 9828 | GORYN          | Belarus | Early  | 217.2 | 100.3 | 133.7 | 168.3 | 98  | - |
| 124 | 9829 | KOMAROVSKAYA 1 | Belarus | Early  | 58.9  | 96.7  | 194.1 | 73.3  | 92  | - |
| 125 | 9830 | DG 1           | Belarus | Early  | 79.8  | 97.0  | 206.0 | 83.3  | 89  | - |
| 126 | 9831 | DG 2           | Belarus | Early  | 83.8  | 97.0  | 205.1 | 81.7  | 89  | - |
| 127 | 9832 | DG 4           | Belarus | Early  | 79.2  | 97.0  | 203.3 | 76.7  | 89  | - |
| 128 | 9833 | DG 5           | Belarus | Early  | 43.2  | 109.7 | 148.4 | 123.3 | 99  | - |
| 129 | 9837 | SITO           | Germany | Early  | 309.4 | 100.3 | 173.3 | 100.0 | 94  | - |

|     |      |                 |             |        |       |       |       |       |     |   |
|-----|------|-----------------|-------------|--------|-------|-------|-------|-------|-----|---|
| 130 | 9844 | KIEVSKAYA 451   | Ukraine     | Early  | 94.3  | 98.0  | 150.1 | 86.0  | 107 | - |
| 131 | 9848 | ARMAVIRSKAYA 13 | Russia      | Late   | 220.7 | 131.0 | 192.3 | 123.3 | 116 | - |
| 132 | 9849 | ARMAVIRSKAYA 15 | Russia      | Late   | 381.9 | 137.3 | 220.3 | 221.7 | 115 | - |
| 133 | 9850 | ZEIKA           | Russia      | Early  | 151.1 | 99.7  | 175.9 | 130.0 | 109 | - |
| 134 | 9852 | NOM.730         | Ukraine     | Early  | 161.8 | 102.7 | 160.8 | 92.5  | 105 | - |
| 135 | 9895 | DIAMOND         | Romania     | Middle | 355.0 | 113.0 | 161.3 | 233.3 | 101 | - |
| 136 | 9896 | HYK GE 122      | North Korea | Middle | 252.9 | 111.0 | 174.5 | 143.3 | 115 | - |
| 137 | 9897 | HYK HA 51       | North Korea | Early  | 195.5 | 108.3 | 165.0 | 155.0 | 105 | - |
| 138 | 9898 | SYULKEBARAT     | North Korea | Middle | 236.4 | 113.0 | 137.3 | 218.3 | 105 | - |
| 139 | 9899 | BREKHAK         | North Korea | Middle | 261.0 | 111.7 | 129.1 | 200.0 | 112 | - |
| 140 | 9900 | ZOCHERHEVCHEN   | North Korea | Middle | 277.2 | 115.7 | 182.6 | 205.0 | 118 | - |
| 141 | 9901 | HOAN 1          | North Korea | Middle | 181.8 | 111.3 | 166.8 | 235.0 | 118 | - |
| 142 | 9902 | MAKSMIS         | China       | Middle | 338.1 | 115.3 | 154.9 | 226.7 | 110 | - |
| 143 | 9903 | HAMBUK 1        | North Korea | Late   | 197.8 | 138.7 | 189.5 | 211.7 | 117 | - |
| 144 | 9904 | FRIMFUKAI       | China       | Early  | 266.5 | 106.0 | 147.0 | 163.3 | 101 | - |
| 145 | 9909 | ZA HVA 4        | North Korea | Middle | 246.2 | 129.0 | 190.5 | 131.7 | 118 | - |
| 146 | 9917 | MAPLE DONOVAN   | Canada      | Middle | 252.6 | 117.1 | 158.4 | 156.7 | 117 | - |
| 147 | 9919 | MAPLE GLEN      | Canada      | Middle | 200.8 | 112.5 | 183.0 | 190.0 | 103 | - |
| 148 | 9920 | NUNGAMDEGYMHVAN | North Korea | Middle | 216.8 | 115.0 | 208.5 | 109.2 | 122 | - |
| 149 | 9921 | MESTNAYA 2      | China       | Late   | 401.8 | 148.4 | 172.4 | 197.5 | -   | - |
| 150 | 9922 | MAJOR           | France      | Early  | 145.0 | 98.3  | 150.8 | 120.0 | 107 | - |
| 151 | 9924 | NS-L 16         | Yugoslavia  | Middle | 221.0 | 117.0 | 111.2 | 215.0 | 121 | - |
| 152 | 9925 | NS-L 60         | Yugoslavia  | Middle | 185.9 | 116.3 | 140.7 | 197.5 | 121 | - |
| 153 | 9926 | NS-L 86         | Yugoslavia  | Middle | 240.4 | 115.7 | 145.7 | 272.5 | 121 | - |
| 154 | 9927 | NS-L 1009       | Yugoslavia  | Middle | 255.2 | 117.3 | 144.3 | 212.5 | 121 | - |
| 155 | 9928 | NS-L 1021       | Yugoslavia  | Middle | 271.2 | 115.7 | 129.8 | 197.5 | 121 | - |
| 156 | 9929 | NS-L 2017       | Yugoslavia  | Middle | 251.1 | 118.3 | 134.7 | 242.5 | 121 | - |
| 157 | 9930 | NS-L 2021       | Yugoslavia  | Middle | 312.9 | 123.7 | 146.9 | 210.0 | 123 | - |
| 158 | 9931 | NS-L 2022       | Yugoslavia  | Middle | 348.0 | 115.3 | 130.4 | 280.0 | 123 | - |
| 159 | 9932 | NS-L 2023       | Yugoslavia  | Middle | 298.7 | 112.0 | 134.4 | 227.5 | 121 | - |
| 160 | 9936 | NS-16           | Yugoslavia  | Middle | 192.3 | 117.0 | 130.7 | 180.0 | 121 | - |
| 161 | 9937 | HARPER 87       | USA         | Late   | 273.9 | 135.4 | 169.3 | 155.0 | 111 | - |
| 162 | 9938 | NEWTON          | USA         | Late   | 238.9 | 134.1 | 150.8 | 232.5 | 123 | - |
| 163 | 9939 | KENWOOD         | USA         | Late   | 308.7 | 134.9 | 136.8 | 155.0 | 123 | - |

|     |       |                  |         |        |       |       |       |       |     |     |
|-----|-------|------------------|---------|--------|-------|-------|-------|-------|-----|-----|
| 164 | 9940  | JACK             | USA     | Late   | 255.5 | 139.7 | 143.0 | 155.0 | 122 | -   |
| 165 | 9941  | A 20             | USA     | Late   | 306.7 | 134.1 | 159.8 | 200.0 | 122 | -   |
| 166 | 9943  | STURDY           | USA     | Late   | 269.4 | 134.3 | 174.0 | 232.5 | 122 | -   |
| 167 | 9944  | MINNATTO         | USA     | Middle | 161.8 | 118.7 | 96.3  | 82.5  | 116 | -   |
| 168 | 9947  | KATO             | USA     | Middle | 224.8 | 129.3 | 187.2 | 175.0 | 116 | -   |
| 169 | 9950  | ZAKAT            | Russia  | Middle | 58.0  | 112.0 | 157.3 | 88.3  | 99  | -   |
| 170 | 9974  | CM-048           | Hungary | Middle | 210.5 | 116.0 | 133.4 | 152.5 | 115 | -   |
| 171 | 9975  | S-1550           | USA     | Middle | 187.6 | 123.3 | 133.3 | 175.0 | 117 | -   |
| 172 | 9976  | S-2312           | Hungary | Late   | 270.4 | 135.6 | 198.4 | 202.0 | 118 | -   |
| 173 | 9977  | S-2710           | Hungary | Late   | 275.5 | 133.3 | 140.5 | 250.0 | 122 | -   |
| 174 | 9978  | BS-31            | Hungary | Middle | 167.9 | 120.0 | 182.4 | 92.5  | 115 | -   |
| 175 | 9979  | B-070            | Hungary | Middle | -     | 111.3 | 137.1 | 118.3 | 112 | 142 |
| 176 | 9981  | YASEL'DA         | Belarus | Early  | 145.9 | 99.7  | 158.0 | 127.5 | 102 | -   |
| 177 | 9982  | RESTA            | Belarus | Early  | 141.4 | 106.0 | 178.1 | 141.7 | 112 | -   |
| 178 | 9983  | SHCHARA          | Belarus | Early  | 132.5 | 105.3 | 174.5 | 100.0 | 102 | -   |
| 179 | 9984  | OL'SA            | Belarus | Early  | 188.5 | 99.0  | 181.0 | 85.0  | 102 | -   |
| 180 | 9985  | AL'BUT           | Belarus | Early  | 183.0 | 105.3 | 189.2 | 142.5 | 102 | -   |
| 181 | 9986  | STVIGA 1         | Belarus | Early  | 153.4 | 103.7 | 192.5 | 132.5 | 102 | -   |
| 182 | 9987  | ISKRA X NORMAN   | Belarus | Early  | 223.6 | 108.3 | 168.8 | 105.5 | 102 | -   |
| 183 | 9988  | 491 X NORMAN     | Belarus | Early  | 271.4 | 104.7 | 163.6 | 97.5  | 103 | -   |
| 184 | 10006 | NS-20            | Hungary | Early  | 211.1 | 104.0 | 134.3 | 70.0  | 106 | 143 |
| 185 | 10007 | NS-9             | Hungary | Middle | 198.1 | 120.0 | 144.6 | 128.3 | 115 | 178 |
| 186 | 10008 | NS-10            | Hungary | Middle | 231.1 | 118.0 | 157.3 | 230.0 | 116 | -   |
| 187 | 10009 | STAROBEL'CHANKA  | Ukraine | Early  | 163.0 | 105.3 | 138.0 | 147.5 | 116 | -   |
| 188 | 10013 | GIESSENER 456/67 | Poland  | Early  | 167.3 | 104.3 | 167.9 | 81.0  | 95  | -   |
| 189 | 10016 | POLAN            | Poland  | Early  | 140.9 | 96.3  | 180.6 | 55.0  | 93  | -   |
| 190 | 10019 | BS-56            | Hungary | Middle | 202.4 | 120.3 | 151.5 | 175.0 | 118 | -   |
| 191 | 10020 | CM-137           | Hungary | Middle | 221.0 | 124.3 | 137.9 | 125.0 | 117 | 157 |
| 192 | 10021 | ISZ-16           | Hungary | Early  | 205.0 | 100.3 | 132.7 | 67.5  | 102 | -   |
| 193 | 10022 | NS-6             | Hungary | Middle | 209.4 | 116.7 | 147.6 | 200.0 | 113 | -   |
| 194 | 10031 | HEY-NUN          | China   | Middle | 173.7 | 126.7 | 166.3 | 157.5 | 120 | -   |
| 195 | 10033 | ALPES 2          | Mexico  | Late   | 299.9 | 149.7 | 168.1 | 102.5 | -   | -   |
| 196 | 10034 | no name          | Vietnam | Middle | 157.5 | 127.7 | 169.2 | 142.5 | 113 | -   |
| 197 | 10035 | no name          | Vietnam | Middle | 249.4 | 125.3 | 147.9 | 152.5 | 119 | -   |

|     |       |                     |             |        |       |       |       |       |     |     |
|-----|-------|---------------------|-------------|--------|-------|-------|-------|-------|-----|-----|
| 198 | 10037 | BURLISON            | USA         | Late   | 205.1 | 148.1 | 157.7 | 45.0  | -   | -   |
| 199 | 10040 | TCERERA             | Ukraine     | Middle | 264.5 | 119.3 | 161.2 | 157.5 | 115 | -   |
| 200 | 10041 | CHARYVNYTCYA STEPUP | Ukraine     | Middle | 261.9 | 117.0 | 174.2 | 245.0 | 112 | -   |
| 201 | 10042 | CHERNOBURAYA        | Ukraine     | Early  | 163.3 | 107.0 | 144.1 | 87.5  | 107 | -   |
| 202 | 10067 | PHENNAM SKOROSPELIY | North Korea | Late   | 124.4 | 159.5 | 213.5 | 107.5 | -   | -   |
| 203 | 10084 | KATAI 3127          | Italy       | Late   | 326.0 | 156.7 | 159.7 | 265.0 | 124 | -   |
| 204 | 10085 | SAKAI               | Italy       | Middle | 274.9 | 125.3 | 166.3 | 216.7 | 112 | -   |
| 205 | 10086 | CONTON              | Italy       | Middle | 328.9 | 128.0 | 170.2 | 248.3 | 114 | -   |
| 206 | 10087 | CONTONDER           | Italy       | Late   | 337.9 | 142.7 | 191.3 | 265.0 | 119 | -   |
| 207 | 10088 | CRUSADER            | Italy       | Middle | 434.7 | 126.3 | 173.1 | 250.0 | 112 | -   |
| 208 | 10091 | ROMEA               | Italy       | Late   | 386.9 | 136.3 | 188.0 | 256.7 | 115 | -   |
| 209 | 10104 | HAROSON             | Canada      | Middle | 267.8 | 125.3 | 170.1 | 230.0 | 111 | -   |
| 210 | 10106 | MESTNYI             | China       | Early  | 130.2 | 109.3 | 158.9 | 127.5 | 110 | -   |
| 211 | 10107 | OAC MUSCA           | Canada      | Middle | 223.0 | 120.5 | 160.1 | 187.5 | 115 | -   |
| 212 | 10109 | OAC DORADO          | Canada      | Middle | 212.4 | 124.5 | 159.9 | 150.0 | 122 | -   |
| 213 | 10111 | CZECHNICKA PASTEWNA | Poland      | Middle | 243.3 | 115.0 | 193.5 | 153.3 | 101 | -   |
| 214 | 10113 | MIKAVASIMA          | Japan       | Middle | 172.7 | 129.6 | -     | 140.0 | 118 | -   |
| 215 | 10114 | no name             | Singapore   | Late   | 250.9 | 132.3 | 143.8 | 191.7 | 119 | 156 |
| 216 | 10115 | CX 298              | USA         | Late   | 266.8 | 149.0 | 161.5 | 187.0 | 125 | 164 |
| 217 | 10116 | CX 345              | USA         | Late   | 286.4 | 149.8 | 139.5 | 178.0 | 126 | 159 |
| 218 | 10117 | CX 366              | USA         | Late   | 261.4 | 152.1 | 156.9 | 186.0 | 125 | 153 |
| 219 | 10118 | S 36-36             | USA         | Late   | 260.1 | 154.0 | 171.2 | 167.0 | 127 | 153 |
| 220 | 10119 | CHI SHA             | China       | Middle | 158.3 | 121.3 | 135.8 | 53.3  | 118 | 125 |
| 221 | 10120 | HO 76-6045          | China       | Middle | 190.8 | 120.0 | 215.3 | 126.7 | 122 | 235 |
| 222 | 10121 | FU PE TOU           | China       | Late   | 211.0 | 154.7 | 120.7 | 75.0  | -   | 123 |
| 223 | 10124 | SAEYUP N 1          | South Korea | Late   | 160.7 | 149.0 | 185.0 | 160.0 | 126 | 220 |
| 224 | 10125 | SEUHAE N 20         | South Korea | Late   | 130.8 | 135.7 | 124.5 | 186.7 | 126 | 156 |
| 225 | 10126 | VARSOVIE            | Poland      | Early  | 134.3 | 100.0 | 196.4 | 141.7 | 107 | -   |
| 226 | 10127 | CZARNA SWHN         | Poland      | Late   | 223.9 | 143.7 | 193.7 | 190.0 | 115 | -   |
| 227 | 10128 | F 40 R/W            | France      | Early  | 182.4 | 99.3  | 187.2 | 100.0 | 109 | 132 |
| 228 | 10129 | F 35 R/KW           | France      | Early  | 140.7 | 100.7 | 195.7 | 41.7  | 101 | 149 |
| 229 | 10130 | F 40 R/KW           | France      | Early  | 124.1 | 99.7  | 189.7 | 60.0  | 101 | 81  |
| 230 | 10131 | F 50 R/KW           | France      | Early  | 121.2 | 99.7  | 178.9 | 75.0  | 110 | 168 |
| 231 | 10132 | RONA                | France      | Early  | 245.1 | 107.0 | 193.2 | 138.3 | 102 | -   |

|     |       |                        |             |        |       |       |       |       |     |   |
|-----|-------|------------------------|-------------|--------|-------|-------|-------|-------|-----|---|
| 232 | 10133 | CING 6268              | France      | Middle | 109.0 | 117.7 | 183.8 | 171.7 | 102 | - |
| 233 | 10134 | STEWART 2302           | USA         | Middle | 204.5 | 112.0 | 183.7 | 198.3 | 107 | - |
| 234 | 10135 | STEWART 741            | USA         | Middle | 265.9 | 114.7 | 170.0 | 151.7 | 109 | - |
| 235 | 10136 | F 70565                | France      | Middle | 254.0 | 116.7 | 141.7 | 168.3 | 112 | - |
| 236 | 10137 | I 1                    | France      | Middle | 228.5 | 113.0 | 166.5 | 161.7 | 112 | - |
| 237 | 10138 | I 5                    | France      | Early  | 147.3 | 103.3 | 186.6 | 131.7 | 104 | - |
| 238 | 10139 | CAROLA                 | France      | Early  | 269.7 | 105.0 | 167.2 | 161.7 | 104 | - |
| 239 | 10140 | NANKING                | France      | Early  | 156.9 | 107.0 | 191.1 | 130.0 | 102 | - |
| 240 | 10141 | SUBOTICA               | Serbia      | Middle | 206.8 | 120.3 | 183.9 | 185.0 | 108 | - |
| 241 | 10142 | PERAGIS STAMM 11       | Germany     | Early  | 123.3 | 99.0  | 185.1 | 101.7 | 97  | - |
| 242 | 10143 | PICKETT                | USA         | Early  | 140.7 | 104.7 | 159.8 | 136.7 | 99  | - |
| 243 | 10144 | DAKOTA                 | France      | Middle | 158.6 | 112.3 | 171.5 | 181.7 | 101 | - |
| 244 | 10146 | PETIT JANNE DE HONGRIE | France      | Middle | 176.3 | 112.3 | 139.1 | 113.3 | 105 | - |
| 245 | 10147 | ONZE NOVEMBRE          | France      | Middle | 158.3 | 111.7 | 191.0 | 160.0 | 105 | - |
| 246 | 10148 | I 3                    | France      | Middle | 196.3 | 115.3 | 157.5 | 190.0 | 107 | - |
| 247 | 10149 | 76260                  | France      | Middle | 191.7 | 120.7 | 184.0 | 208.3 | 108 | - |
| 248 | 10150 | 76268                  | France      | Middle | 178.6 | 120.7 | 185.2 | 180.0 | 109 | - |
| 249 | 10151 | 76292                  | France      | Late   | 232.0 | 130.7 | 142.5 | 185.0 | 111 | - |
| 250 | 10152 | HY-21                  | France      | Middle | 186.2 | 117.3 | 166.4 | 123.3 | 110 | - |
| 251 | 10154 | OX 305                 | France      | Late   | 211.7 | 137.3 | 119.1 | 208.3 | 114 | - |
| 252 | 10155 | HW 741                 | France      | Late   | 272.6 | 145.7 | 193.7 | 220.0 | 121 | - |
| 253 | 10156 | 02611                  | France      | Middle | 239.0 | 129.3 | 201.3 | 270.0 | 110 | - |
| 254 | 10157 | NS KASNA               | France      | Late   | 239.3 | 142.7 | 158.7 | 218.3 | 114 | - |
| 255 | 10158 | ODS 33                 | France      | Middle | 319.9 | 129.7 | 228.4 | 248.3 | 106 | - |
| 256 | 10159 | SPLENDOR               | France      | Late   | 397.3 | 141.7 | 194.7 | 266.7 | 119 | - |
| 257 | 10160 | MPG 1652               | France      | Late   | 267.1 | 141.7 | 199.6 | 183.3 | 119 | - |
| 258 | 10161 | I HIGO-WASE            | Japan       | Middle | 174.0 | 122.4 | 122.3 | 108.3 | 105 | - |
| 259 | 10162 | GOYOU KURAKAKE         | Japan       | Late   | 254.1 | 149.5 | 212.7 | 188.3 | 124 | - |
| 260 | 10164 | B-236                  | USA         | Late   | 317.6 | 145.3 | 202.8 | 263.3 | 120 | - |
| 261 | 10166 | PI 452432              | China       | Middle | 198.1 | 115.3 | 209.7 | 190.0 | 108 | - |
| 262 | 10171 | PI 458123 A            | South Korea | Late   | 232.0 | 161.3 | 206.6 | 223.3 | -   | - |
| 263 | 10174 | 577-9                  | South Korea | Late   | 204.9 | 156.1 | 198.7 | 161.7 | -   | - |
| 264 | 10178 | KAI YU N 3             | China       | Late   | 303.3 | 156.7 | 215.3 | 205.0 | 120 | - |
| 265 | 10179 | Qi Huang 10            | China       | Late   | 244.2 | 159.3 | 171.6 | 173.3 | -   | - |



|     |       |                         |       |        |       |       |       |       |     |   |
|-----|-------|-------------------------|-------|--------|-------|-------|-------|-------|-----|---|
| 266 | 10180 | PI 458519 A             | China | Late   | 214.6 | 158.3 | 120.5 | 96.7  | 122 | - |
| 267 | 10181 | PI 458519 B             | China | Late   | 293.8 | 157.0 | 134.4 | 148.3 | 122 | - |
| 268 | 10182 | PI 458520               | China | Late   | 172.8 | 159.3 | 204.4 | 80.0  | 122 | - |
| 269 | 10183 | PI 458521               | China | Late   | 237.2 | 161.0 | 120.0 | 110.0 | -   | - |
| 270 | 10184 | PI 458522               | China | Late   | 200.4 | 161.0 | 125.9 | 153.3 | 121 | - |
| 271 | 10185 | BUMPER HARVEST N 2      | China | Late   | 249.7 | 133.3 | 227.3 | 205.0 | 117 | - |
| 272 | 10187 | NUEN FENG N 7           | China | Middle | 200.4 | 123.3 | 183.2 | 148.3 | 115 | - |
| 273 | 10189 | GONGJIAO 7128-1         | China | Middle | 198.4 | 124.0 | 178.7 | 178.3 | 115 | - |
| 274 | 10191 | JILING N 14             | China | Late   | 230.8 | 138.7 | 206.7 | 160.0 | 114 | - |
| 275 | 10193 | TIE LING BAIMEI         | China | Late   | 238.7 | 147.3 | 210.4 | 190.0 | 120 | - |
| 276 | 10195 | BAI MOSHI DOU           | China | Late   | 186.3 | 146.1 | 112.4 | 123.3 | 121 | - |
| 277 | 10197 | DAHUANG DOU             | China | Late   | 367.1 | 148.3 | 213.3 | 173.3 | 120 | - |
| 278 | 10198 | DALIHEI                 | China | Late   | 202.4 | 163.3 | 232.5 | 135.0 | -   | - |
| 279 | 10199 | JIM NONG N 9            | China | Late   | -     | 154.7 | 202.2 | 200.0 | 121 | - |
| 280 | 10201 | ZI HUA (GONG DI N 1)    | China | Late   | 276.5 | 155.7 | 189.7 | 211.7 | 121 | - |
| 281 | 10205 | JOU NONG N 9            | China | Late   | 247.4 | 154.0 | 211.2 | 178.3 | 121 | - |
| 282 | 10206 | TIE FENG 3              | China | Late   | 281.9 | 153.0 | 166.7 | 195.0 | 119 | - |
| 283 | 10207 | TIE FENG 17             | China | Late   | 339.3 | 153.3 | 200.9 | 183.3 | 122 | - |
| 284 | 10208 | TIE FENG 18             | China | Late   | 354.7 | 159.0 | 206.9 | 201.7 | 127 | - |
| 285 | 10209 | BAI HO SHI DOU (GONG 1) | China | Late   | 147.0 | 163.7 | 113.4 | 121.7 | -   | - |
| 286 | 10210 | BEIJING HEI DOU         | China | Late   | 189.1 | 152.7 | 103.7 | 136.7 | 112 | - |
| 287 | 10211 | DAN DOU 3               | China | Late   | 462.0 | 165.8 | 212.4 | 260.0 | 127 | - |
| 288 | 10212 | HEI MOSHI DOU (GONG 2)  | China | Late   | 256.4 | 158.7 | 121.3 | 86.7  | 116 | - |
| 289 | 10213 | JITI 2                  | China | Late   | 401.7 | 148.0 | 183.5 | 201.7 | -   | - |
| 290 | 10214 | KAI YUAN BAI MEI        | China | Late   | 333.5 | 156.0 | 211.8 | 213.3 | -   | - |
| 291 | 10215 | TIE FEN 9               | China | Late   | 307.1 | 147.3 | 182.8 | 168.3 | -   | - |
| 292 | 10216 | TIE FEN 16              | China | Late   | 303.9 | 147.0 | 215.5 | 228.3 | 120 | - |
| 293 | 10217 | WEN FENG N 1538         | China | Late   | 319.0 | 163.3 | 197.6 | 183.3 | -   | - |
| 294 | 10218 | WEN FENG N 1893         | China | Late   | 292.9 | 164.0 | 208.5 | 171.7 | -   | - |
| 295 | 10219 | WU JUI HUO              | China | Late   | 155.0 | 157.8 | 169.8 | 125.0 | 124 | - |
| 296 | 10220 | BAI-HUA-KUAN            | China | Late   | 210.5 | 134.2 | 179.1 | 195.0 | 116 | - |
| 297 | 10221 | BAI-NONG N 1            | China | Middle | 245.4 | 126.1 | 200.2 | 165.0 | 117 | - |
| 298 | 10222 | BAI-NONG N 1            | China | Middle | 287.4 | 127.3 | 205.0 | 186.7 | 117 | - |
| 299 | 10223 | DA-HEI-GI               | China | Middle | 157.8 | 125.7 | 189.5 | 158.3 | 109 | - |

|     |       |                    |       |        |       |       |       |       |     |   |
|-----|-------|--------------------|-------|--------|-------|-------|-------|-------|-----|---|
| 300 | 10224 | DA-HUANG-GI        | China | Late   | 257.8 | 141.0 | 196.9 | 191.7 | 115 | - |
| 301 | 10225 | DA-JIN-HUONG       | China | Late   | 298.7 | 149.7 | 205.1 | 185.0 | 124 | - |
| 302 | 10226 | DE-DOU N 1         | China | Late   | 200.4 | 143.3 | 210.7 | 168.3 | 119 | - |
| 303 | 10227 | JILIN N 17         | China | Late   | 251.4 | 135.3 | 173.1 | 180.0 | 115 | - |
| 304 | 10228 | JILIN N 19         | China | Late   | 348.0 | 142.0 | 190.4 | 176.7 | 115 | - |
| 305 | 10229 | JIU-NONG N 13      | China | Middle | 314.9 | 120.3 | 175.4 | 135.0 | 112 | - |
| 306 | 10230 | JIU-NONG N 13      | China | Late   | 379.9 | 142.7 | 186.0 | 168.3 | 118 | - |
| 307 | 10231 | LIANG-LI-GING      | China | Late   | 246.5 | 157.7 | 191.6 | 150.0 | -   | - |
| 308 | 10233 | QIN-DOU 84         | China | Late   | 233.7 | 162.7 | 229.3 | 195.0 | 124 | - |
| 309 | 10234 | QING MO SHI DOU    | China | Late   | 261.9 | 157.0 | 133.3 | 118.3 | 120 | - |
| 310 | 10235 | SHUI-LI-HONG       | China | Late   | 250.6 | 154.3 | 205.3 | 208.3 | 120 | - |
| 311 | 10236 | SI-LI-QING         | China | Late   | 259.3 | 159.0 | 235.3 | 155.0 | 124 | - |
| 312 | 10237 | TIE-JIA-DOU        | China | Late   | 238.4 | 154.2 | 203.2 | 231.7 | 120 | - |
| 313 | 10238 | TONG-NONG N 4      | China | Late   | 205.6 | 146.0 | 177.8 | 171.7 | 118 | - |
| 314 | 10239 | TONG-NONG N 5      | China | Late   | 405.4 | 150.0 | 187.0 | 206.7 | 120 | - |
| 315 | 10240 | TONG-NONG N 7      | China | Late   | 268.3 | 147.3 | 169.5 | 201.7 | 120 | - |
| 316 | 10241 | XIAO-BAI-MEI       | China | Late   | 283.9 | 144.3 | 165.5 | 255.0 | 118 | - |
| 317 | 10242 | XIAO-BAI-GI        | China | Late   | 201.3 | 150.3 | 174.5 | 178.3 | 119 | - |
| 318 | 10243 | XIAO-NEI-GI        | China | Late   | 297.0 | 151.0 | 148.8 | 191.7 | 119 | - |
| 319 | 10244 | YAN-NONG N 2       | China | Late   | 280.1 | 137.7 | 204.9 | 211.7 | 119 | - |
| 320 | 10245 | YAN-NONG N 72      | China | Late   | 237.2 | 133.7 | 202.6 | 173.3 | 115 | - |
| 321 | 10247 | ZI-HUA-CUO-ZI      | China | Late   | 365.4 | 141.3 | 178.8 | 163.3 | 119 | - |
| 322 | 10248 | HOUG-KONG 2        | China | Early  | 180.1 | 107.7 | 215.4 | 178.3 | 107 | - |
| 323 | 10249 | HOUG KONG 3        | China | Early  | 140.1 | 106.0 | 210.2 | 171.7 | 107 | - |
| 324 | 10250 | 23                 | China | Middle | 191.4 | 128.3 | 201.3 | 191.7 | 112 | - |
| 325 | 10251 | TAKIIS AKITA EARLY | China | Middle | 193.4 | 129.3 | 233.2 | 181.7 | 118 | - |
| 326 | 10252 | QI HUANG 1         | China | Late   | 313.8 | 164.7 | 153.3 | 198.3 | -   | - |
| 327 | 10253 | QI HUANG 1         | China | Late   | 251.7 | 160.7 | 206.9 | 175.0 | -   | - |
| 328 | 10254 | no name            | China | Late   | 220.1 | 147.7 | 109.2 | 233.3 | 112 | - |
| 329 | 10256 | no name            | China | Late   | 242.7 | 147.7 | 112.7 | 198.3 | 114 | - |
| 330 | 10257 | no name            | China | Middle | 286.8 | 121.0 | 148.6 | 108.3 | 107 | - |
| 331 | 10258 | no name            | China | Middle | 262.5 | 115.0 | 180.2 | 65.0  | 98  | - |
| 332 | 10259 | no name            | China | Middle | 272.3 | 123.0 | 116.4 | 148.3 | 112 | - |
| 333 | 10260 | KEI-YU 8           | China | Late   | 334.4 | 164.0 | 221.3 | 243.3 | 116 | - |

|     |       |                   |       |        |       |       |       |       |     |   |
|-----|-------|-------------------|-------|--------|-------|-------|-------|-------|-----|---|
| 334 | 10261 | SHEN NONG 252     | China | Late   | 432.1 | 161.0 | 179.4 | 236.7 | -   | - |
| 335 | 10262 | SHEN NONG 906     | China | Late   | 415.3 | 166.0 | 217.1 | 230.0 | 124 | - |
| 336 | 10263 | SHEN NONG 7224    | China | Late   | 413.5 | 160.0 | 187.2 | 175.0 | 127 | - |
| 337 | 10264 | SHEN NONG 75-15   | China | Late   | -     | 154.0 | 228.4 | 185.0 | 127 | - |
| 338 | 10265 | no name           | China | Late   | 238.4 | 157.2 | 183.2 | 200.0 | 122 | - |
| 339 | 10266 | FUNSHU 11         | China | Middle | 227.9 | 115.3 | 218.2 | 108.3 | 108 | - |
| 340 | 10267 | NE 4              | China | Late   | 295.8 | 140.3 | 187.0 | 181.7 | 111 | - |
| 341 | 10268 | TSING 2           | China | Late   | 310.9 | 161.7 | 148.9 | 123.3 | 127 | - |
| 342 | 10269 | TSING 2           | China | Late   | 265.1 | 161.3 | 169.2 | 175.0 | -   | - |
| 343 | 10270 | TSING 202         | China | Late   | 221.6 | 161.3 | 187.6 | 175.0 | 116 | - |
| 344 | 10271 | TSING 371         | China | Late   | 250.3 | 155.0 | 201.7 | 155.0 | -   | - |
| 345 | 10272 | no name           | China | Late   | 221.4 | 157.0 | 123.4 | 103.3 | 117 | - |
| 346 | 10273 | no name           | China | Late   | 186.3 | 147.7 | 105.8 | 93.3  | 117 | - |
| 347 | 10274 | no name           | China | Late   | 217.8 | 166.3 | 132.3 | 86.7  | 120 | - |
| 348 | 10276 | no name           | China | Late   | 338.0 | 163.8 | 162.4 | 121.7 | 124 | - |
| 349 | 10277 | no name           | China | Late   | 265.1 | 147.3 | 109.3 | 121.7 | 117 | - |
| 350 | 10278 | no name           | China | Late   | 212.9 | 137.3 | 121.3 | 155.0 | 117 | - |
| 351 | 10279 | no name           | China | Late   | 280.1 | 150.0 | 112.0 | 136.7 | 117 | - |
| 352 | 10280 | no name           | China | Late   | 316.4 | 142.3 | 108.8 | 168.3 | 116 | - |
| 353 | 10281 | no name           | China | Middle | 112.8 | 124.3 | 128.4 | 125.0 | 104 | - |
| 354 | 10282 | no name           | China | Late   | 194.9 | 138.7 | 181.4 | 145.0 | 118 | - |
| 355 | 10283 | no name           | China | Late   | 196.0 | 158.3 | 138.5 | 168.3 | 124 | - |
| 356 | 10284 | no name           | China | Late   | 260.7 | 145.3 | 111.7 | 143.3 | 119 | - |
| 357 | 10285 | no name           | China | Late   | 208.4 | 145.0 | 108.2 | 156.7 | 119 | - |
| 358 | 10287 | no name           | China | Late   | 254.9 | 147.3 | 107.5 | 158.3 | 117 | - |
| 359 | 10288 | JINYAN N 1        | China | Late   | 160.4 | 130.7 | 187.3 | 195.0 | 112 | - |
| 360 | 10290 | ZAO SHUGI HAO N 1 | China | Late   | 198.4 | 133.3 | 241.2 | 243.3 | 114 | - |
| 361 | 10291 | THANG CHAP        | China | Late   | 191.1 | 144.0 | 126.5 | 163.8 | 118 | - |
| 362 | 10292 | FENGSHOU N 1      | China | Late   | 163.0 | 131.7 | 227.6 | 173.3 | 115 | - |
| 363 | 10293 | HEFENG N 4        | China | Middle | 160.4 | 130.3 | 217.6 | 198.3 | 114 | - |
| 364 | 10294 | ANFUHEIDO         | China | Late   | 268.0 | 136.7 | 122.3 | 231.7 | 118 | - |
| 365 | 10295 | ANTUXIAOHEIDOU    | China | Late   | 370.3 | 141.3 | 154.9 | 246.7 | 117 | - |
| 366 | 10297 | BEILIANG 11       | China | Middle | 196.3 | 113.7 | 212.8 | 163.3 | 109 | - |
| 367 | 10300 | CAIZHONGPU        | China | Late   | 230.8 | 150.7 | 162.1 | 221.7 | 120 | - |

|     |       |                  |             |        |       |       |       |       |     |   |
|-----|-------|------------------|-------------|--------|-------|-------|-------|-------|-----|---|
| 368 | 10302 | DAHUANGDOU       | China       | Late   | 304.5 | 159.7 | 221.4 | 218.3 | 122 | - |
| 369 | 10303 | HELONGDADOU      | China       | Late   | 327.4 | 155.3 | 211.5 | 190.0 | 122 | - |
| 370 | 10304 | HUAIXUAN         | China       | Late   | 224.5 | 155.7 | 185.8 | 191.7 | 122 | - |
| 371 | 10305 | HUINANNIMAOHUANG | China       | Late   | 238.7 | 144.7 | 169.9 | 263.3 | 122 | - |
| 372 | 10307 | HUITIEJIA        | China       | Late   | 257.8 | 143.0 | 169.4 | 220.0 | 116 | - |
| 373 | 10308 | HUITIEJIA        | China       | Late   | 263.9 | 140.7 | 197.3 | 180.0 | 114 | - |
| 374 | 10309 | TINYAN N 30      | China       | Late   | 360.5 | 151.7 | 200.4 | 188.3 | 116 | - |
| 375 | 10310 | LIUHEDAHEIDON    | China       | Late   | 195.0 | 138.3 | 157.7 | 240.0 | 116 | - |
| 376 | 10311 | NIUSHIDOU        | China       | Late   | 245.1 | 162.7 | 190.2 | 193.3 | 120 | - |
| 377 | 10312 | SILIHUANG        | China       | Late   | 176.6 | 166.0 | 141.5 | 228.3 | 121 | - |
| 378 | 10313 | SULANDULUDOU     | China       | Late   | 196.0 | 141.0 | 197.0 | 208.3 | 115 | - |
| 379 | 10314 | SUOYILING        | China       | Late   | 212.6 | 143.0 | 153.6 | 203.3 | 120 | - |
| 380 | 10315 | WANGGINGINGDON   | China       | Late   | 235.2 | 147.0 | -     | 193.3 | 120 | - |
| 381 | 10316 | XIAOHUANGKE      | China       | Late   | 288.8 | 156.7 | 199.5 | 220.0 | 122 | - |
| 382 | 10317 | XIAOYANDOU       | China       | Late   | 268.3 | 159.7 | 224.5 | 185.0 | 120 | - |
| 383 | 10318 | ZHONGSHENG N 11  | China       | Late   | 343.7 | 159.7 | 173.9 | 198.3 | 120 | - |
| 384 | 10319 | ZHUYANDOU        | China       | Late   | 455.6 | 145.0 | 217.8 | 163.3 | 119 | - |
| 385 | 10320 | MAFENG 5         | China       | Late   | 225.0 | 134.3 | 179.0 | 166.7 | 112 | - |
| 386 | 10321 | MUFU 80-3125     | China       | Late   | 248.2 | 132.7 | 158.0 | 183.3 | 116 | - |
| 387 | 10322 | MUFU 81-4420     | China       | Middle | 284.2 | 124.7 | 218.0 | 226.7 | 116 | - |
| 388 | 10323 | HEINONG 4        | China       | Late   | 185.9 | 153.7 | 226.1 | 158.3 | 116 | - |
| 389 | 10324 | HWANGKEUNKONG    | South Korea | Late   | 227.7 | 147.0 | 186.2 | 155.0 | -   | - |
| 390 | 10357 | T 304 H          | USA         | Late   | 168.2 | 134.3 | 145.0 | 165.0 | 111 | - |
| 391 | 10360 | T-307            | USA         | Middle | 153.7 | 121.0 | 156.3 | 183.3 | 106 | - |
| 392 | 10369 | T 318            | USA         | Late   | 200.1 | 136.0 | 153.7 | 213.3 | 118 | - |
| 393 | 10403 | NATTOSAN         | Canada      | Early  | 84.1  | 100.0 | 93.0  | 136.7 | 103 | - |
| 394 | 10525 | APACHE           | Slovakia    | Middle | 125.0 | 113.0 | 180.2 | 183.3 | 102 | - |
| 395 | 10530 | C 7/ 58          | Germany     | Early  | 147.9 | 102.0 | 177.7 | 130.0 | 112 | - |
| 396 | 10532 | 300-7(88)        | Belarus     | Early  | 81.2  | 102.0 | 165.0 | 125.0 | 111 | - |
| 397 | 10533 | 331-8(88)        | Belarus     | Early  | 107.3 | 107.3 | 152.3 | 161.7 | 113 | - |
| 398 | 10568 | HEINONG 27       | China       | Early  | 169.7 | 107.5 | 192.5 | 150.0 | 112 | - |
| 399 | 10572 | ZLOTKA           | France      | Middle | 185.3 | 119.7 | 139.3 | 195.0 | 108 | - |
| 400 | 10573 | C-833            | France      | Middle | 208.8 | 120.0 | 151.3 | 118.3 | 109 | - |
| 401 | 10575 | OX - 619         | France      | Middle | 100.1 | 112.3 | 168.6 | 145.0 | 106 | - |

|     |       |                       |             |        |       |       |       |       |     |     |
|-----|-------|-----------------------|-------------|--------|-------|-------|-------|-------|-----|-----|
| 402 | 10576 | 574-13                | South Korea | Late   | 192.6 | 155.0 | 215.7 | 148.3 | -   | -   |
| 403 | 10577 | 578-4                 | South Korea | Late   | 272.3 | 154.0 | 225.9 | 173.3 | -   | -   |
| 404 | 10579 | AIDADOU               | China       | Middle | 195.8 | 126.3 | 221.3 | 193.3 | 109 | -   |
| 405 | 10580 | DONG FENG DULUDOU     | China       | Late   | 195.8 | 166.3 | 213.4 | 171.7 | -   | -   |
| 406 | 10581 | no name               | China       | Late   | 235.5 | 166.3 | 164.5 | 121.7 | 124 | -   |
| 407 | 10583 | BODUL'IPKON           | North Korea | Late   | 198.4 | 149.3 | 199.6 | 51.7  | -   | -   |
| 408 | 10631 | EVANS X AMURSKAYA 462 | Russia      | Early  | 136.3 | 100.2 | 199.3 | 80.0  | 100 | -   |
| 409 | 10632 | P.I.458189 B          | South Korea | Late   | 161.5 | 150.3 | 230.8 | 138.3 | -   | -   |
| 410 | 10671 | KAS 233-5             | South Korea | Late   | 291.5 | 159.7 | 196.1 | 165.0 | 125 | 162 |
| 411 | 10673 | HEIPIQING YIANG       | China       | Late   | 154.0 | 143.0 | 162.0 | 163.3 | 111 | -   |
| 412 | 10675 | DOM                   | France      | Middle | 241.0 | 118.3 | 178.3 | 171.3 | 110 | 163 |
| 413 | 10680 | VOSHOD* 1191/79       | Russia      | Early  | 123.7 | 101.0 | 195.7 | 122.5 | 102 | -   |
| 414 | 10697 | TAKIYA 560            | Japan       | Late   | 78.3  | 161.3 | 132.7 | 73.3  | 130 | 138 |
| 415 | 10702 | OT 91-3               | Canada      | Middle | 148.2 | 123.0 | 127.7 | 164.3 | 115 | 146 |
| 416 | 10703 | ACHIEVER              | Canada      | Middle | 219.8 | 122.3 | 202.3 | 193.8 | 107 | 181 |
| 417 | 10709 | Liao Nong N2          | China       | Late   | 325.4 | 157.0 | 196.7 | 178.3 | 123 | 147 |
| 418 | 10917 | 233-15                | South Korea | Late   | 151.1 | 166.3 | 226.4 | 82.5  | -   | -   |
| 419 | 10918 | JIAOHETIANEDAN        | China       | Late   | 224.8 | 140.0 | -     | 137.5 | 122 | -   |
| 420 | 10919 | T 293                 | USA         | Middle | 81.2  | 111.0 | 155.7 | 143.8 | 101 | 177 |
| 421 | 10920 | T 311                 | USA         | Late   | 159.5 | 136.7 | 124.7 | 124.2 | 124 | 117 |
| 422 | 10921 | ICHOU                 | Japan       | Late   | 89.9  | 161.3 | 165.3 | 55.0  | -   | 131 |
| 423 | 10923 | N/M 4888              | Poland      | Early  | 134.9 | 101.3 | 198.0 | 114.0 | 102 | 203 |
| 424 | 10924 | EXTRA EARLY OWSLOW    | Australia   | Early  | 107.9 | 96.0  | 161.0 | 136.9 | 106 | 144 |
