# Supplementary material
Source: MDPI journal article supplement (https://www.mdpi.com/2073-4395/10/9/1278)
Supplement: s1 [file s1]

**Table S2.** The characteristics of standard varieties in Krasnodar and Primorye Territories of Russia.

| Year | Komsomolka (Krasnodar Territory) |                     |                         | Primorskaya 529 (Primorie Territory) |                     |                         |
|------|----------------------------------|---------------------|-------------------------|--------------------------------------|---------------------|-------------------------|
|      | Yield<br>(g m <sup>-2</sup> )    | Days to<br>maturity | 1000 seed<br>weight (g) | Yield<br>(g m <sup>-2</sup> )        | Days to<br>maturity | 1000 seed<br>weight (g) |
| 1972 | -                                | -                   | -                       | -                                    | 124                 | -                       |
| 1973 | 258                              | 138                 | -                       | -                                    | -                   | -                       |
| 1974 | 293                              | 129                 | 157                     | -                                    | -                   | -                       |
| 1975 | 169                              | 134                 | 172                     | -                                    | 130                 | -                       |
| 1976 | 232                              | 153                 | 197                     | -                                    | 121                 | -                       |
| 1977 | 299                              | 140                 | 168                     | -                                    | 121                 | -                       |
| 1978 | 322                              | 138                 | 190                     | -                                    | 107                 | -                       |
| 1979 | 386                              | 127                 | 208                     | -                                    | -                   | -                       |
| 1980 | 239                              | 127                 | 156                     | -                                    | -                   | -                       |
| 1981 | 357                              | 131                 | 176                     | -                                    | -                   | -                       |
| 1982 | 426                              | 140                 | 189                     | -                                    | -                   | -                       |
| 1983 | 157                              | 121                 | 187                     | -                                    | -                   | -                       |
| 1984 | 439                              | 132                 | 211                     | -                                    | -                   | -                       |
| 1985 | 90                               | 138                 | 155                     | -                                    | -                   | -                       |
| 1986 | 130                              | 124                 | 177                     | -                                    | -                   | -                       |
| 1987 | 294                              | 140                 | 194                     | -                                    | -                   | -                       |
| 1988 | -                                | 136                 | 165                     | -                                    | -                   | -                       |
| 1989 | 296                              | 135                 | 172                     | -                                    | -                   | -                       |
| 1990 | 217                              | 128                 | 164                     | 256                                  | 119                 | -                       |
| 1991 | -                                | 132                 | 168                     | 238                                  | 114                 | -                       |
| 1992 | 312                              | 136                 | 174                     | 277                                  | 125                 | -                       |
| 1993 | 358                              | 149                 | 180                     | 130                                  | 123                 | -                       |
| 1994 | 113                              | 118                 | 114                     | 285                                  | 123                 | -                       |
| 1995 | 301                              | 127                 | 186                     | 170                                  | 125                 | -                       |
| 1996 | 296                              | 147                 | 174                     | 219                                  | 120                 | -                       |
| 1997 | 348                              | 141                 | 196                     | 215                                  | 114                 | -                       |
| 1998 | 164                              | 126                 | 149                     | 199                                  | 123                 | 174                     |
| 1999 | 518                              | 127                 | 189                     | 321                                  | 124                 | 250                     |
| 2000 | 316                              | 135                 | 176                     | -                                    | -                   | -                       |
| 2001 | 142                              | 138                 | 198                     | -                                    | -                   | -                       |
| 2002 | 196                              | 129                 | 189                     | 105                                  | 126                 | 199                     |
| 2003 | 265                              | 133                 | 176                     | 195                                  | 121                 | 188                     |
| 2004 | 453                              | 142                 | 156                     | 372                                  | 129                 | 215                     |
| 2005 | 357                              | 130                 | 163                     | 345                                  | 128                 | 225                     |
| 2006 | 145                              | 131                 | 170                     | 263                                  | 121                 | 205                     |
| 2007 | 62                               | 151                 | 182                     | 246                                  | 120                 | 204                     |
| 2008 | 296                              | 144                 | 173                     | 281                                  | 116                 | 213                     |
| 2009 | 304                              | 126                 | 167                     | 234                                  | 123                 | 203                     |
| 2010 | -                                | 92                  | 174                     | -                                    | 123                 | 206                     |
| 2011 | -                                | 115                 | 183                     | 244                                  | 121                 | 207                     |
| 2012 | -                                | 143                 | 190                     | 116                                  | 126                 | 212                     |
| 2013 | -                                | -                   | -                       | 244                                  | 121                 | 239                     |
| 2014 | -                                | 117                 | 184                     | 351                                  | 117                 | 220                     |
| 2015 | -                                | 117                 | 97                      | -                                    | -                   | -                       |
| 2016 | -                                | -                   | -                       | -                                    | -                   | -                       |
| 2017 | -                                | -                   | -                       | 219                                  | 116                 | 220                     |
